# Supplementary material
Source: PubMed Central journal article supplement (PMC7265786)
Supplement: blood-2014-08-595108-1.pdf [file blood-2014-08-595108-1.pdf]

**Central Nervous System Acute Lymphoblastic Leukemia: role of Natural Killer**

**Cells. Liron Frishman-Levy et al.**

## **Supplementary File**

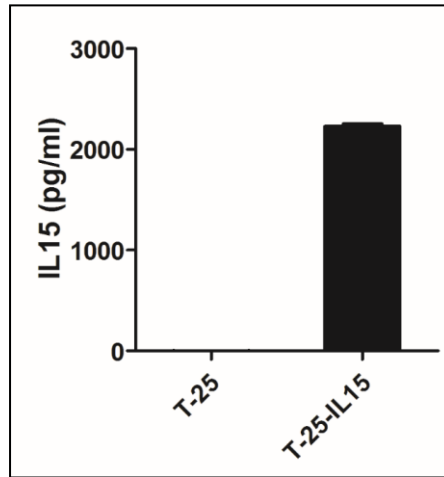

**Figure S1:** IL-15 secretion from T-25 cells stably transfected with IL-15 expression vector (ELISA).

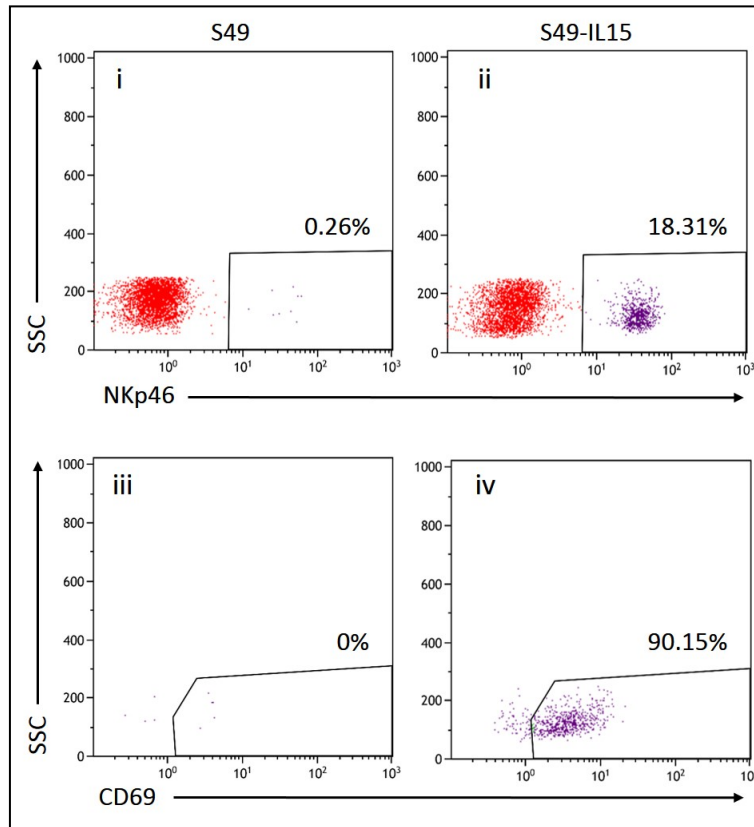

**Figure S2:** BALB/C mice were i.p. injected with T-25-IL15 (n=4) or T-25 (n=4) cells as control. Representative scatter plots demonstrating increased proportion of NK cells (upper panel) as well as NK activation state (lower panel) in the T-25-IL15 group (ii and iv respectively) compared to the control group (i and iii).

**Figure S3:**

10<sup>6</sup> primary bone marrow cells (>90% blasts) from 2 patients with BCP-ALL were injected in parallel into NSG and NOD-SCID mice by intrafemoral injections. Mice were sacrificed when they showed leukemic symptoms. Patient A was t(1;19) positive and had a CNS 2b status at initial diagnosis. Patient B had no known cytogenetic changes and a CNS 3 status. **(A)** The percentage of leukemic blasts in the peripheral blood of mice was assessed by FACS analysis of human CD19/human CD45/mouse CD45 when mice started showing neurological symptoms (day 26 for patient A, day 46 for patient B). **(B)**: Post-mortem splenic volume in the xenograft mice as assessed by the formula longest length x broadest width x highest height (cm<sup>3</sup>). **(C)** Total number of spleen cells (>90% blasts) recovered from the xenograft mice. **(D)** Histological scoring of CNS infiltration according to the

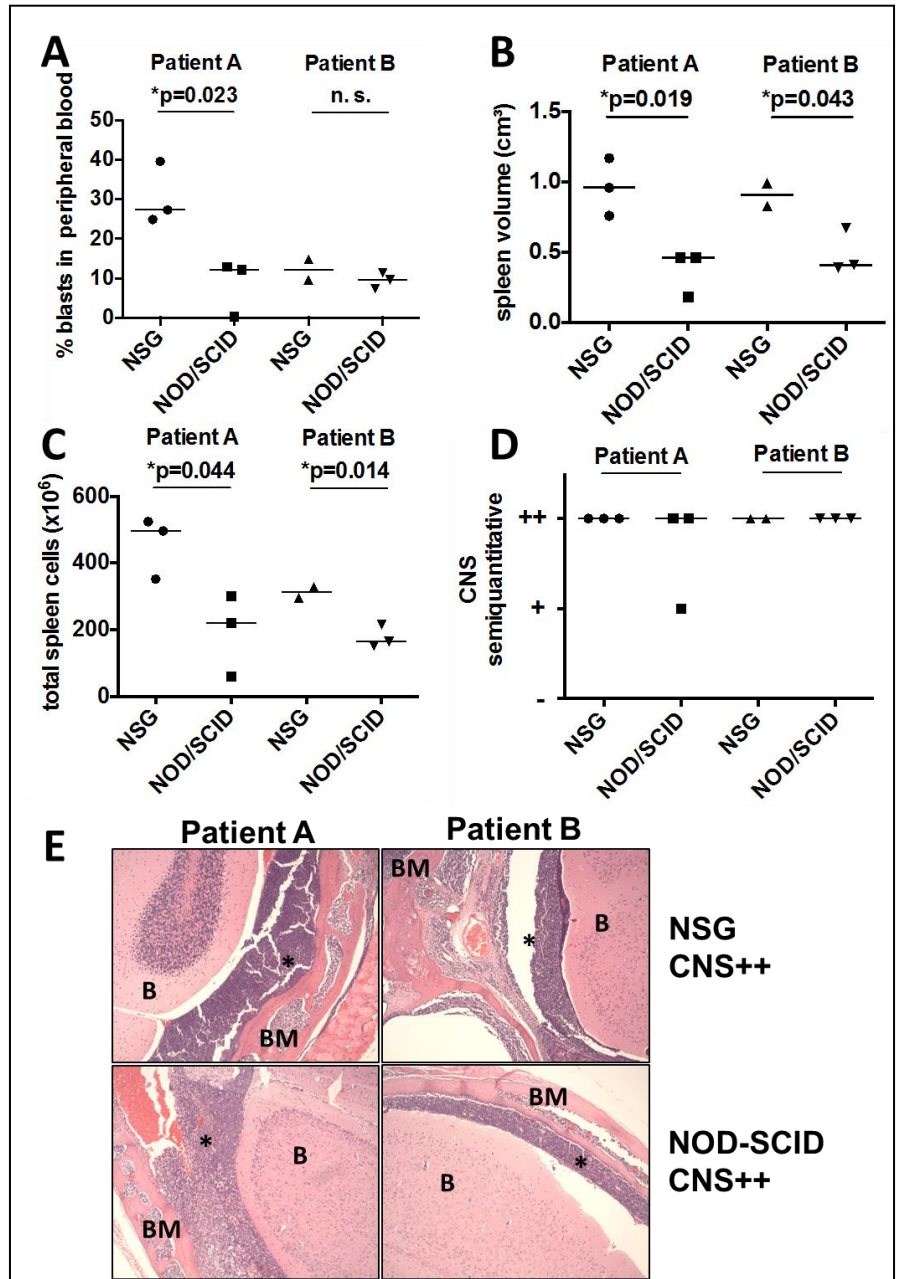

algorithm published by Krause et al.<sup>1</sup>: Negative (-), no detectable cells in the space between skull bone and brain tissue; intermediate (+), infiltration of the Dura but no subdural infiltration; positive (++) ,infiltration of the dura and the subdural space. **(E)** Representative examples of brain sections of one NSG and one NOD-SCID xenograft mouse for each patient.

Hematoxylin/Eosin staining, 100x magnification view. Statistics were performed using Student's t-test. P-values <0.05 were considered statistically significant.

1. Krause S, Pfeiffer C, Strube S, et al. Mer tyrosine kinase promotes the survival of t(1;19) positive acute lymphoblastic leukemia (ALL) in the central nervous system (CNS). *Blood*. 2014.

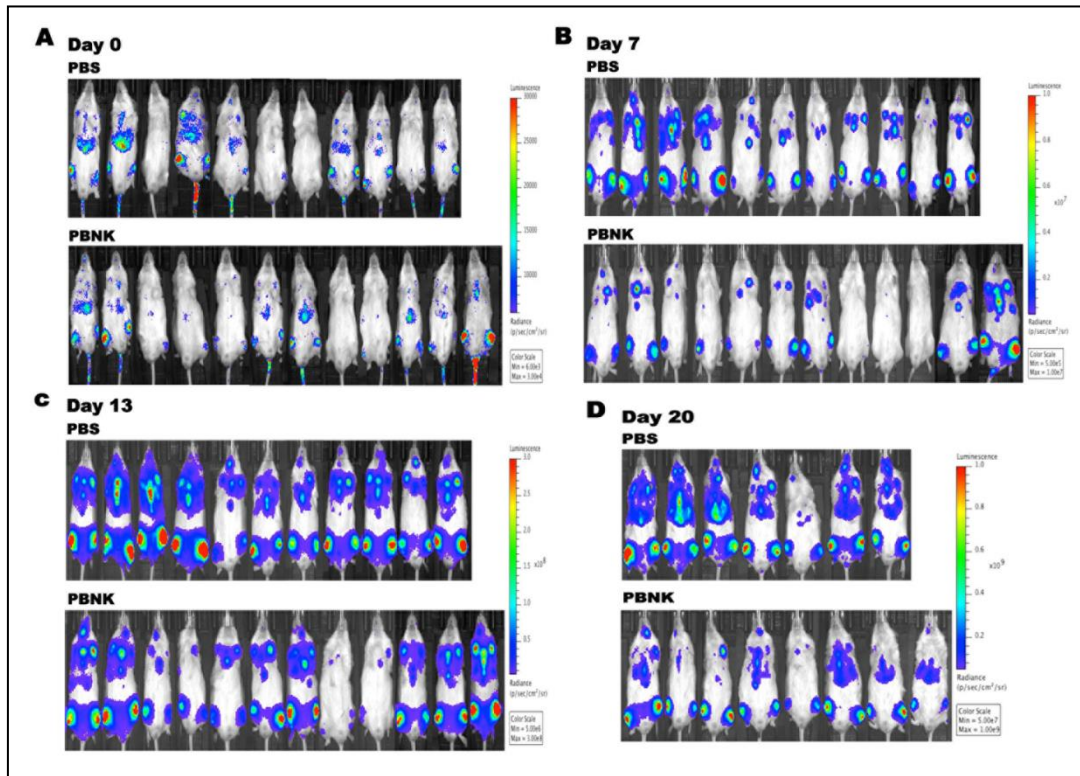

**Figure S4:** Bioluminescence imaging of tumor growth in 018Z-grafted NSG mouse model. Day 0, 7, 13 and 20 bioluminescence imaging data of mice treated with PBS (controls) and PBNK cells (PBS group: n=11; PBNK group: n=12). Quantification of bioluminescence and statistical analysis as in Figure 5A.

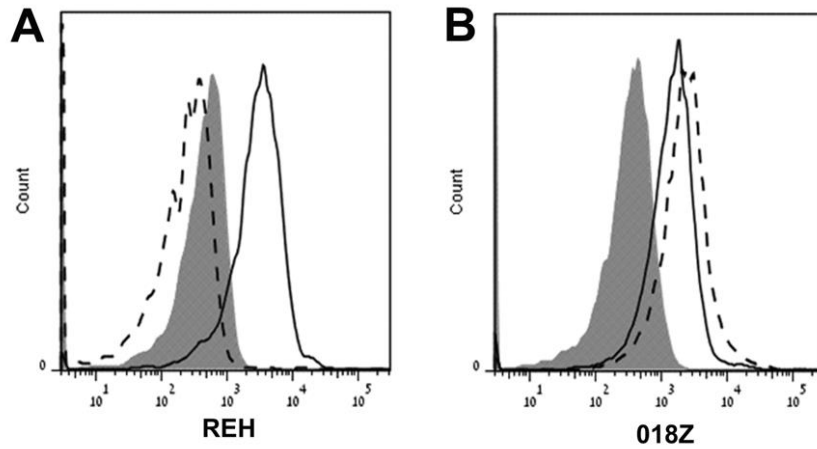

**Figure S5:** Staining of 018Z and REH cell lines with human Fc-fusion proteins of KIR2DL1 and KIR2DL2 followed by labeling with APC goat anti-human IgG. Non-specific binding was detected by staining with human Fc-protein (Filled Gray). Human Fc-fusion-KIR2DL1 (Black line), human Fc-fusion-KIR2DL2 (Dashed line).

**HLA class I and KIR genotyping:**

NK source: HLA: A\*01, A\*30, B\*53, B\*57, Cw\*04 and Cw\*06

REH cell line: HLA: A\*23, A\*32, B\*35, B\*50, Cw\*04 and Cw\*06

018Z cell line: HLA: A\*01, A\*02, B\*08, B\*15, Cw\*04 and Cw\*07

KIR genotyping of NK source used in this study: 2DL1, 2DL2, 2DL3, 2DL4, 2DL5B, 2DS2, 2DS4<sup>FULL</sup>, 2DS4<sup>DEL</sup>, 3DL1, 3DL2, 3DL3, 2DP1, 3DP1<sup>DELL</sup>.

HLA-KIR genotype comparison was performed using the EMBL-EBI website (<http://www.ebi.ac.uk/ipd/kir/ligand.html>).

018Z and REH expressed ligands for KIR2DL1 (Cw\*04 and Cw\*06) and 018Z expressed in addition HLA-Cw\*07, a KIR2DL2/3 ligand

HLA-B alleles of NK source were both Bw4 (B\*53/B\*06) while both REH and 018Z cell lines HLA-B alleles were Bw6 (B\*35/B\*50, B\*08/B\*15 respectively).
